# Supplementary material for: Boron Removal by Sorption on Modified Chitosan Hydrogel Beads
Source: MDPI journal article supplement (doi:10.3390/ma14195646), 2021-09-28
Supplement: s1 [file s1]

# Boron Removal by Sorption on Modified Chitosan Hydrogel Beads

Joanna Kluczka, Gabriela Dudek, Wojciech Pudło, Alicja Kazek-Kęsik and Roman Turczyn

## Fourier-Transform Infrared Spectroscopy Results and Discussion

Figure S1 shows the FTIR spectra of the unmodified chitosan beads and those filled with manganese particles. The spectrum of pure chitosan beads showed several characteristic bands. The bands at  $1652$  and  $1596\text{ cm}^{-1}$  corresponded to the  $\text{-C=O}$  stretching of the amide I from non-deacetylated amine groups and the  $\text{N-H}$  bending of the amide II, respectively. The  $\text{-CH}_2$  bending and  $\text{-CH}_3$  symmetrical deformations gave bands at around  $1420$  and  $1381\text{ cm}^{-1}$ , respectively. The band at  $1151\text{ cm}^{-1}$  was attributed to asymmetric stretching of the  $\text{C-O-C}$  bridge of the ether group. The bands at  $1077$  and  $1028\text{ cm}^{-1}$  corresponded to the  $\text{C-OH}$  stretching of the secondary hydroxyl group, and the  $\text{C-OH}$  and  $\text{C-NH}_2$  stretching of the primary hydroxyl and amine groups, respectively. Additionally, a carbon ring breathing mode peak at  $944\text{ cm}^{-1}$  and an amine group out-of-plane ( $\text{N-H}$  wagging) peak at  $894\text{ cm}^{-1}$  were noted. The Mn-biosorbent demonstrated two significant absorption peaks at  $600$  and  $420\text{ cm}^{-1}$  that were characteristic of  $\text{Mn-O}$  stretching modes in tetrahedral sites, whereas the vibration frequency at  $550\text{ cm}^{-1}$  corresponded to the distortion vibration mode of  $\text{Mn-O}$  peak in an octahedral environment [29]. In the spectrum of Mn-biosorbent-B, a noticeable weakening of the tetrahedral  $\text{Mn-O}$  peak at  $600\text{ cm}^{-1}$  and the octahedral  $\text{Mn-O}$  band at  $550\text{ cm}^{-1}$ , which was hardly visibly in the shoulder, was noted, along with the appearance of two signals at  $475$  and  $414\text{ cm}^{-1}$ , respectively. This was probably an effect of the interaction with adsorbed boron species. The bands originated from the vibrations of  $\text{B-O}$  bonds, which were expected in the  $1200\text{--}1350\text{ cm}^{-1}$  and  $900\text{ cm}^{-1}$  regions, were not observed on the spectrum due to the overlapping with signals originated from a polymer matrix.

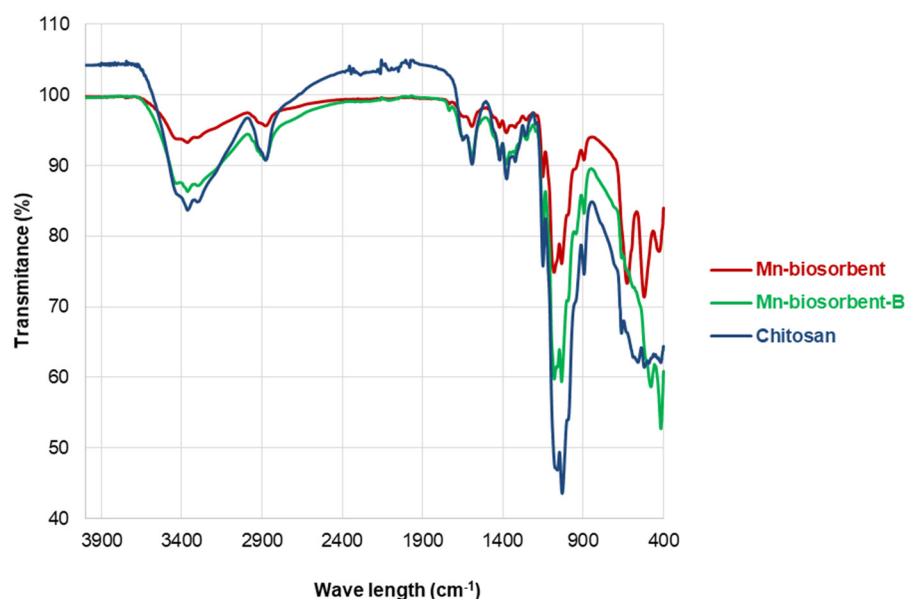

**Figure S1.** FTIR spectra of the unmodified chitosan, the Mn-biosorbent and the Mn-biosorbent after boron sorption (Mn-biosorbent-B) [28].

### Scanning Electron Microscopy results

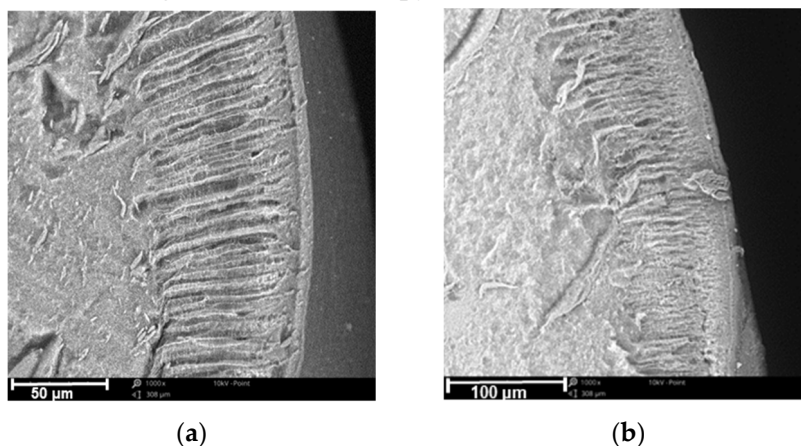

**Figure S2.** SEM image of a cross-section of the Mn-biosorbent bead (a) and SEM image of the Mn-biosorbent after boron sorption (Mn-biosorbent-B) (b).

### Specific Surface Area Results

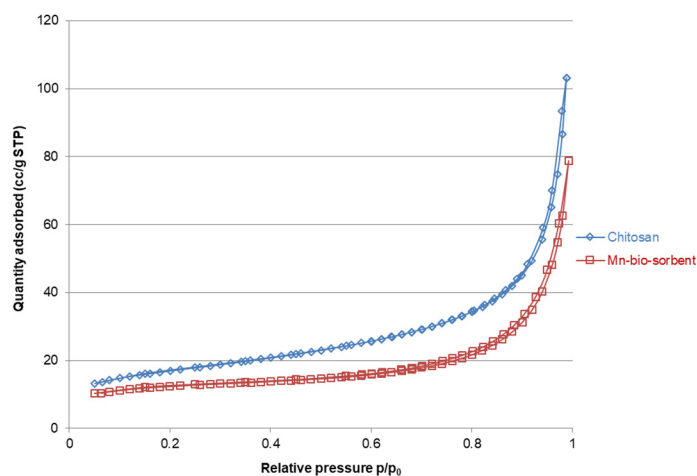

**Figure S3.** Nitrogen adsorption isotherms for unmodified chitosan and Mn-biosorbent.

### The Stability of the Mn-Biosorbent Hydrogel Beads

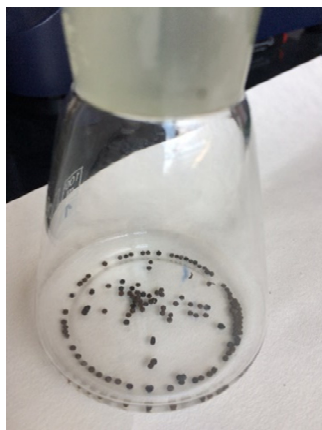

**Figure S4.** Photo of the Mn-biosorbent hydrogel beads just after the third boron sorption cycle completed.
